# Supplementary material
Source: PubMed Central journal article supplement (PMC4688087)
Supplement: NIHMS725784-supplement-Supp_FigureS1-S2.pdf [file NIHMS725784-supplement-Supp_FigureS1-S2.pdf]

Figure S1

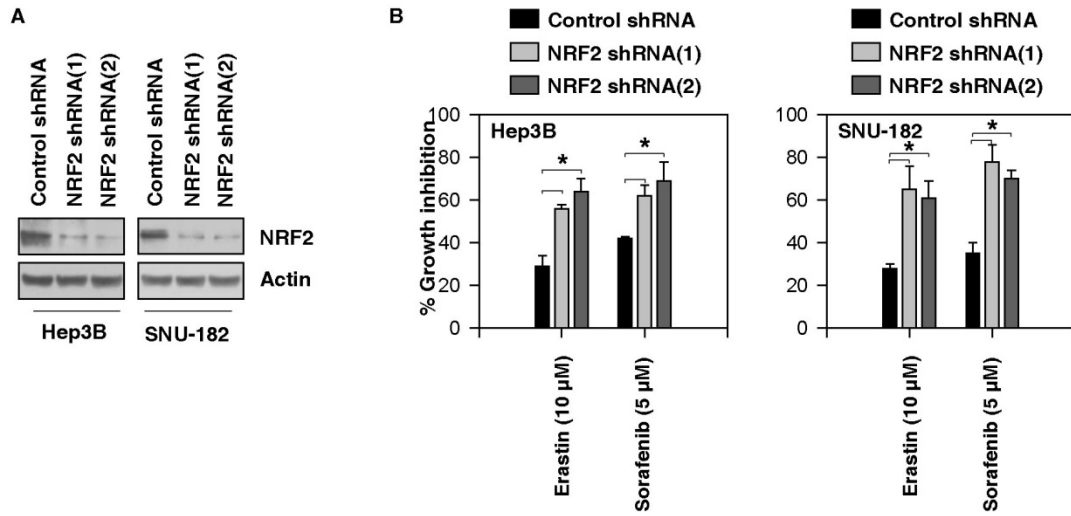

**Figure S1. NRF2 expression contributes to ferroptosis resistance.** (A) Western blot analysis of NRF2 expression in indicated NRF2 knockdown human HCC cells. (B) Indicated knockdown HCC cells were treated with erastin and sorafenib for 24 hours, and cell viabilities were assayed (n=3, \*p < 0.05).

Figure S2

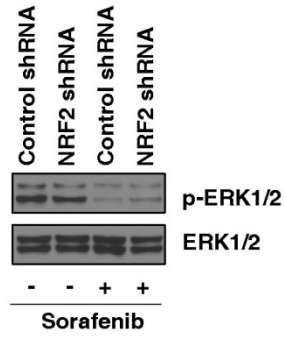

**Figure S2. Effects of NRF2 expression on sorafenib-induced downregulation of phosphorylated ERK1/2.** NRF2 knockdown cells (HepG2) were treated with 5  $\mu$ M sorafenib for 24 hours, and western blot was assayed.
